# Supplementary material
Source: PubMed Central journal article supplement (PMC4177949)
Supplement: NIHMS593898-supplement-01.pdf [file NIHMS593898-supplement-01.pdf]

**Table 1.** International Classification of Diseases, 9<sup>th</sup> Revision, Clinical Modification Codes

| Condition                        | ICD-9-CM Codes                                                                                                                                                                                                                                                                                                                                                                                                                                                                                                                                                                                                                                                                                                                                                                                                                                                                                                                                                                                                                                                                                                                                                                                                                                                                                                                                                                                                                                                                                                                                                                                                                                                                                                                                                                                                                                                                                                                                                                                                                                                                                                                                                                                                                                                                                                                                                                                                                                                                                                                                                                                                                                                                  |
|----------------------------------|---------------------------------------------------------------------------------------------------------------------------------------------------------------------------------------------------------------------------------------------------------------------------------------------------------------------------------------------------------------------------------------------------------------------------------------------------------------------------------------------------------------------------------------------------------------------------------------------------------------------------------------------------------------------------------------------------------------------------------------------------------------------------------------------------------------------------------------------------------------------------------------------------------------------------------------------------------------------------------------------------------------------------------------------------------------------------------------------------------------------------------------------------------------------------------------------------------------------------------------------------------------------------------------------------------------------------------------------------------------------------------------------------------------------------------------------------------------------------------------------------------------------------------------------------------------------------------------------------------------------------------------------------------------------------------------------------------------------------------------------------------------------------------------------------------------------------------------------------------------------------------------------------------------------------------------------------------------------------------------------------------------------------------------------------------------------------------------------------------------------------------------------------------------------------------------------------------------------------------------------------------------------------------------------------------------------------------------------------------------------------------------------------------------------------------------------------------------------------------------------------------------------------------------------------------------------------------------------------------------------------------------------------------------------------------|
| Age-related Macular Degeneration | 362.50, 362.51, 362.52, 362.57                                                                                                                                                                                                                                                                                                                                                                                                                                                                                                                                                                                                                                                                                                                                                                                                                                                                                                                                                                                                                                                                                                                                                                                                                                                                                                                                                                                                                                                                                                                                                                                                                                                                                                                                                                                                                                                                                                                                                                                                                                                                                                                                                                                                                                                                                                                                                                                                                                                                                                                                                                                                                                                  |
| Branch Retinal Vein Occlusion    | 362.36                                                                                                                                                                                                                                                                                                                                                                                                                                                                                                                                                                                                                                                                                                                                                                                                                                                                                                                                                                                                                                                                                                                                                                                                                                                                                                                                                                                                                                                                                                                                                                                                                                                                                                                                                                                                                                                                                                                                                                                                                                                                                                                                                                                                                                                                                                                                                                                                                                                                                                                                                                                                                                                                          |
| Cancer                           | 140,140.0, 140.1, 140.3, 140.4, 140.5, 140.6, 140.8, 140.9, 141, 141.0, 141.1, 141.2, 141.3, 141.4, 141.5, 141.6, 141.8, 141.9, 142, 142.0, 142.1, 142.2, 142.8, 142.9, 143, 143.0, 143.1, 143.8, 143.9, 144, 144.0, 144.1, 144.8, 144.9, 145, 145.0, 145.1, 145.2, 145.3, 145.4, 145.5, 145.6, 145.8, 145.9, 146, 146.0, 146.1, 146.2, 146.3, 146.4, 146.5, 146.6, 146.7, 146.8, 146.9, 147, 147.0, 147.1, 147.2, 147.3, 147.8, 147.9, 148, 148.0, 148.1, 148.2, 148.3, 148.8, 148.9, 149, 149.0, 149.1, 149.8, 149.9, 150, 150.0, 150.1, 150.2, 150.3, 150.4, 150.5, 150.8, 150.9, 151,151.0, 151.1, 151.2, 151.3, 151.4, 151.5, 151.6, 151.8, 151.9, 152, 152.0, 152.1, 152.2, 152.3, 152.8, 152.9, 153, 153.0, 153.1, 153.2, 153.3, 153.4, 153.5, 153.6, 153.7, 153.8, 153.9, 154, 154.0, 154.1, 154.2, 154.3, 154.8, 155, 155.0, 155.1, 155.2, 156, 156.0, 156.1, 156.2, 156.8, 156.9, 157, 157.0, 157.1, 157.2, 157.3, 157.4, 157.8, 157.9, 158, 158.0, 158.8, 158.9, 159, 159.0, 159.1, 159.8, 159.9, 160, 160.0, 160.1, 160.2, 160.3, 160.4, 160.5, 160.8, 160.9, 161, 161.0, 161.1, 161.2, 161.3, 161.8, 161.9, 162,162.0, 162.2, 162.3, 162.4, 162.5, 162.8, 162.9, 163, 163.0, 163.1, 163.8, 163.9, 164, 164.0, 164.1, 164.2, 164.3, 164.8, 164.9, 165, 165.0, 165.8, 165.9, 170, 170.0, 170.1, 170.2, 170.3, 170.4, 170.5, 170.6, 170.7, 170.8, 170.9, 171, 171.0, 171.2, 171.3, 171.4, 171.5, 171.6, 171.7, 171.8, 171.9, 172, 172.0, 172.1, 172.2, 172.3, 172.4, 172.5, 172.6, 172.7, 172.8, 172.9, 174, 174.0, 174.1, 174.2, 174.3, 174.4, 174.5, 174.6, 174.8, 174.9, 175, 175.0, 175.9, 176, 176.0, 176.1, 176.2, 176.3, 176.4, 176.5, 176.8, 176.9, 179, 180, 180.0, 180.1, 180.8, 180.9, 181, 182, 182.0, 182.1, 182.8, 183, 183.0, 183.2, 183.3, 183.4, 183.5, 183.8, 183.9, 184, 184.0, 184.1, 184.2, 184.3, 184.4, 184.8, 184.9, 185, 186, 186.0, 186.9, 187, 187.1, 187.2, 187.3, 187.4, 187.5, 187.6, 187.7, 187.8, 187.9, 188, 188.0, 188.1, 188.2, 188.3, 188.4, 188.5, 188.6, 188.7, 188.8, 188.9, 189, 189.0, 189.1, 189.2, 189.3, 189.4, 189.8, 189.9, 190, 190.0, 190.1, 190.2, 190.3, 190.4, 190.5, 190.6, 190.7, 190.8, 190.9, 191,191.0, 191.1, 191.2, 191.3, 191.4, 191.5, 191.6, 191.7, 191.8, 191.9, 192, 192.0, 192.1, 192.2, 192.3, 192.8, 192.9, 193, 194, 194.0, 194.1, 194.3, 194.4, 194.5, 194.6, 194.8, 194.9, 195, 195.0, 195.1, 195.2, 195.3, 195.4, 195.5, 195.8, 200, 200.0, 200.1, 200.2, 200.8, 201, 201.0, 201.1, 201.2, 201.4, 201.5, 201.6, 201.7, 201.9, 202, 202.0, 202.1, 202.2, 202.3, 202.4, 202.5, 202.6, 202.8, 202.9, 203, 203.0, 203.00, 203.01, 203.1, 203.10, 203.11, 204, 204.0, 204.00, 204.01, 204.1, 204.10, |

|                                              |                                                                                                                                                                                                                                                                                                                                                                                                                                                                                                                                                                       |
|----------------------------------------------|-----------------------------------------------------------------------------------------------------------------------------------------------------------------------------------------------------------------------------------------------------------------------------------------------------------------------------------------------------------------------------------------------------------------------------------------------------------------------------------------------------------------------------------------------------------------------|
|                                              | 204.11, 204.2, 204.20, 204.21, 204.8, 204.80, 204.81, 204.9, 204.90, 204.91, 205, 205.0, 205.00, 205.01, 205.1, 205.10, 205.11, 205.2, 205.20, 205.21, 205.3, 205.30, 205.31, 205.8, 205.80, 205.81, 205.9, 205.90, 205.91, 206, 206.0, 206.00, 206.01, 206.1, 206.10, 206.11, 206.2, 206.20, 206.21, 206.8, 206.80, 206.81, 207, 207.0, 207.00, 207.01, 207.1, 207.10, 207.11, 207.2, 207.20, 207.21, 207.8, 207.80, 207.81, 208, 208.0, 208.00, 208.01, 220.81, 208.10, 208.11, 208.2, 208.20, 208.21, 208.8, 208.80, 208.81, 208.9, 208.90, 208.91, 238.6          |
| Cataract                                     | 366, 366.0, 366.00, 366.01, 366.02, 366.03, 366.04, 366.09, 366.1, 366.10, 366.12, 366.13, 366.14, 366.15, 366.16, 366.17, 366.18, 366.19, 366.41, 366.45                                                                                                                                                                                                                                                                                                                                                                                                             |
| Central Retinal Vein Occlusion               | 362.35                                                                                                                                                                                                                                                                                                                                                                                                                                                                                                                                                                |
| Cerebrovascular Accident                     | 362.34, 430, 431, 432, 432.0, 432.1, 432.9, 433, 433.0, 433.1, 433.2, 433.3, 433.8, 433.9, 434, 434.0, 434.00, 434.01, 434.1, 434.10, 434.11, 434.9, 434.90, 434.91, 435, 435.0, 435.1, 435.2, 435.3, 435.8, 435.9, 436, 437, 437.0, 437.1, 437.2, 437.3, 437.4, 437.5, 437.6, 437.7, 437.8, 437.9, 438, 438.0, 438.1, 438.10, 438.11, 438.12, 438.19, 438.2, 438.20, 438.21, 438.22, 438.3, 438.30, 438.31, 438.32, 438.4, 438.40, 438.41, 438.42, 438.5, 438.50, 438.51, 438.52, 438.53, 438.6, 438.7, 438.8, 438.81, 438.82, 438.83, 438.84, 438.85, 438.89, 438.9 |
| Congestive Heart Failure                     | 398.91, 402.01, 402.11, 402.91, 404.01, 404.03, 404.11, 404.13, 404.91, 404.93, 425.4, 425.5, 425.7, 425.8, 425.9, 428, 428.0, 428.1, 428.2, 428.20, 428.21, 428.22, 428.23, 428.3, 428.30, 428.31, 428.32, 428.33, 428.4, 428.40, 428.41, 428.42, 428.43, 428.9                                                                                                                                                                                                                                                                                                      |
| Deep Venous Thrombosis or Pulmonary Embolism | 415.19, 453.40, 453.41, 453.42                                                                                                                                                                                                                                                                                                                                                                                                                                                                                                                                        |
| Dementia                                     | 290, 290.0, 290.1, 290.10, 290.11, 290.12, 290.13, 290.2, 290.20, 290.21, 290.3, 290.4, 290.40, 290.41, 290.42, 290.43, 290.8, 290.9, 294.1, 294.10, 294.11, 331.2                                                                                                                                                                                                                                                                                                                                                                                                    |
| Depression                                   | 296, 296.0, 296.00, 296.01, 296.02, 296.03, 296.04, 296.05, 296.06, 296.1, 296.10, 296.11, 296.12, 296.13, 296.14, 296.15, 296.16, 296.2, 296.20, 296.21, 296.22, 296.23, 296.24, 296.25, 296.26, 296.3, 296.30, 296.31, 296.32, 296.33, 296.34, 296.35, 296.36, 296.4, 296.40, 296.41, 296.42, 296.43, 296.44, 296.45, 296.46, 296.5, 296.50, 296.51, 296.52, 296.53, 296.54, 296.55, 296.56, 296.6, 296.60, 296.61, 296.62, 296.63, 296.64, 296.65, 296.66, 296.7, 296.70, 296.71,                                                                                  |

|                                 |                                                                                                                                                                                                                                                                                                                                                                                                                                                                                                     |
|---------------------------------|-----------------------------------------------------------------------------------------------------------------------------------------------------------------------------------------------------------------------------------------------------------------------------------------------------------------------------------------------------------------------------------------------------------------------------------------------------------------------------------------------------|
|                                 | 296.72, 296.73, 296.74, 296.75, 296.76, 296.8, 296.80, 296.81, 296.82, 296.89, 296.9, 296.90, 296.99                                                                                                                                                                                                                                                                                                                                                                                                |
| Diabetes mellitus               | 250.0, 250.00, 250.01, 250.02, 250.03, 250.1, 250.10, 250.11, 250.12, 250.13, 250.2, 250.20, 250.21, 250.22, 250.23, 250.3, 250.30, 250.31, 250.32, 250.33, 250.4, 250.40, 250.41, 250.42, 250.43, 250.5, 250.50, 250.51, 250.52, 250.53, 250.5, 250.50, 250.51, 250.52, 250.53, 250.6, 250.60, 250.61, 250.62, 250.63, 250.7, 250.70, 250.71, 250.72, 250.73, 250.8, 250.80, 250.81, 250.82, 250.83, 250.9, 250.90, 250.91, 250.92, 250.93, 362.01, 362.02, 362.03, 362.04, 362.05, 362.06, 362.07 |
| Uncomplicated Diabetes Mellitus | 250.3, 250.30, 250.31, 250.32, 250.33, 250.8, 250.80, 250.81, 250.82, 250.83, 250.9, 250.90, 250.91, 250.92, 250.93, 250.0, 250.00, 250.01, 250.02, 250.03, 250.1, 250.10, 250.11, 250.12, 250.13, 250.2, 250.20, 250.21, 250.22, 250.23                                                                                                                                                                                                                                                            |
| Complicated Diabetes Mellitus   | 250.4, 250.40, 250.41, 250.42, 250.43, 250.5, 250.50, 250.51, 250.52, 250.53, 250.6, 250.60, 250.61, 250.62, 250.63, 250.7, 250.70, 250.71, 250.72, 250.73, 362.01, 362.02, 362.03, 362.04, 362.05, 362.06, 362.07                                                                                                                                                                                                                                                                                  |
| Hypercoagulable State           | 289.81, 289.82                                                                                                                                                                                                                                                                                                                                                                                                                                                                                      |
| Hyperlipidemia                  | 272, 272.0, 272.1, 272.2, 272.3, 272.4, 272.5, 272.6, 272.7, 272.8, 272.9                                                                                                                                                                                                                                                                                                                                                                                                                           |
| Hypertension                    | 401, 401.0, 401.1, 401.9, 405, 405.0, 405.1, 405.01, 405.09, 405.11, 405.19, 405.9, 405.91, 405.99, 362.11, 402, 402.0, 402.00, 402.01, 402.1, 402.10, 402.11, 402.9, 402.90, 402.91, 403, 403.0, 403.00, 403.01, 403.1, 403.10, 403.11, 403.9, 403.90, 403.91, 404.0, 404.00, 404.01, 404.02, 404.03, 404.1, 404.10, 404.11, 404.12, 404.13, 404.9, 404.90, 404.91, 404.92, 404.93                                                                                                                 |
| Uncomplicated Hypertension      | 401, 401.0, 401.1, 401.9, 405, 405.0, 405.1, 405.01, 405.09, 405.11, 405.19, 405.9, 405.91, 405.99                                                                                                                                                                                                                                                                                                                                                                                                  |
| Complicated Hypertension        | 362.11, 402, 402.0, 402.00, 402.01, 402.1, 402.10, 402.11, 402.9, 402.90, 402.91, 403, 403.0, 403.00, 403.01, 403.1, 403.10, 403.11, 403.9, 403.90, 403.91, 404.0, 404.00, 404.01, 404.02, 404.03, 404.1, 404.10, 404.11, 404.12, 404.13, 404.9, 404.90, 404.91, 404.92, 404.93                                                                                                                                                                                                                     |
| Myocardial Infarction           | 410, 410.0, 410.00, 410.01, 410.02, 410.1, 410.10, 410.11, 410.12, 410.2, 410.20, 410.21, 410.22, 410.3, 410.30, 410.31, 410.32, 410.4, 410.40, 410.41, 410.42, 410.5, 410.50, 410.51, 410.52, 410.6, 410.60, 410.61, 410.62, 410.7, 410.70, 410.71, 410.72, 410.8, 410.80, 410.81, 410.82, 410.9, 410.90, 410.91, 410.92, 412                                                                                                                                                                      |

|                              |                                                                                                                                                                                                                                                                                                                    |
|------------------------------|--------------------------------------------------------------------------------------------------------------------------------------------------------------------------------------------------------------------------------------------------------------------------------------------------------------------|
| Ocular Hypertension          | 365.04                                                                                                                                                                                                                                                                                                             |
| Open-angle glaucoma          | 365.1, 365.10, 365.11, 365.12, 365.15                                                                                                                                                                                                                                                                              |
| Other Retinal Vein Occlusion | 362.30                                                                                                                                                                                                                                                                                                             |
| Peripheral Artery Disease    | 093.0, 437.3, 440, 440.0, 440.1, 440.2, 440.20, 440.21, 440.22, 440.23, 440.24, 440.29, 441, 441.0, 441.00, 441.01, 441.02, 441.03, 441.1, 441.2, 441.3, 441.4, 441.5, 441.6, 441.7, 441.9, 443.1, 443.2, 443.21, 443.22, 443.23, 443.24, 443.29, 443.8, 443.81, 443.82, 443.89, 443.9, 447.1, 557.1, 557.9, V43.4 |
| Exfoliation Syndrome         | 366.11, 365.52                                                                                                                                                                                                                                                                                                     |
| Pseudophakia or aphakia      | V43.1, 379.3, 379.31                                                                                                                                                                                                                                                                                               |
| Sleep apnea syndrome         | 327.2, 327.20, 327.21, 327.23, 327.27, 327.29, 780.51, 780.53, 780.57                                                                                                                                                                                                                                              |

Anticoagulants include: Marevin, Jantoven, Coumadin, Warfarin, Heparin, Clopidogrel, Ticlopidine, Plavix, Miradon, Dicumarol, Enoxaparin, Acenocoumarol, Anisinsione, Sintrom

ICD-9-CM = International Classification of Diseases, 9<sup>th</sup> Revision, Clinical Modification
